# Supplementary material for: A CK2 and SUMO-dependent, PML NB-involved regulatory mechanism controlling BLM ubiquitination and G-quadruplex resolution
Source: Springer Nature journal article supplement (doi:10.1038/s41467-023-41705-9), 2023-09-30
Supplement: MOESM1 [file 41467_2023_41705_MOESM1_ESM.pdf]

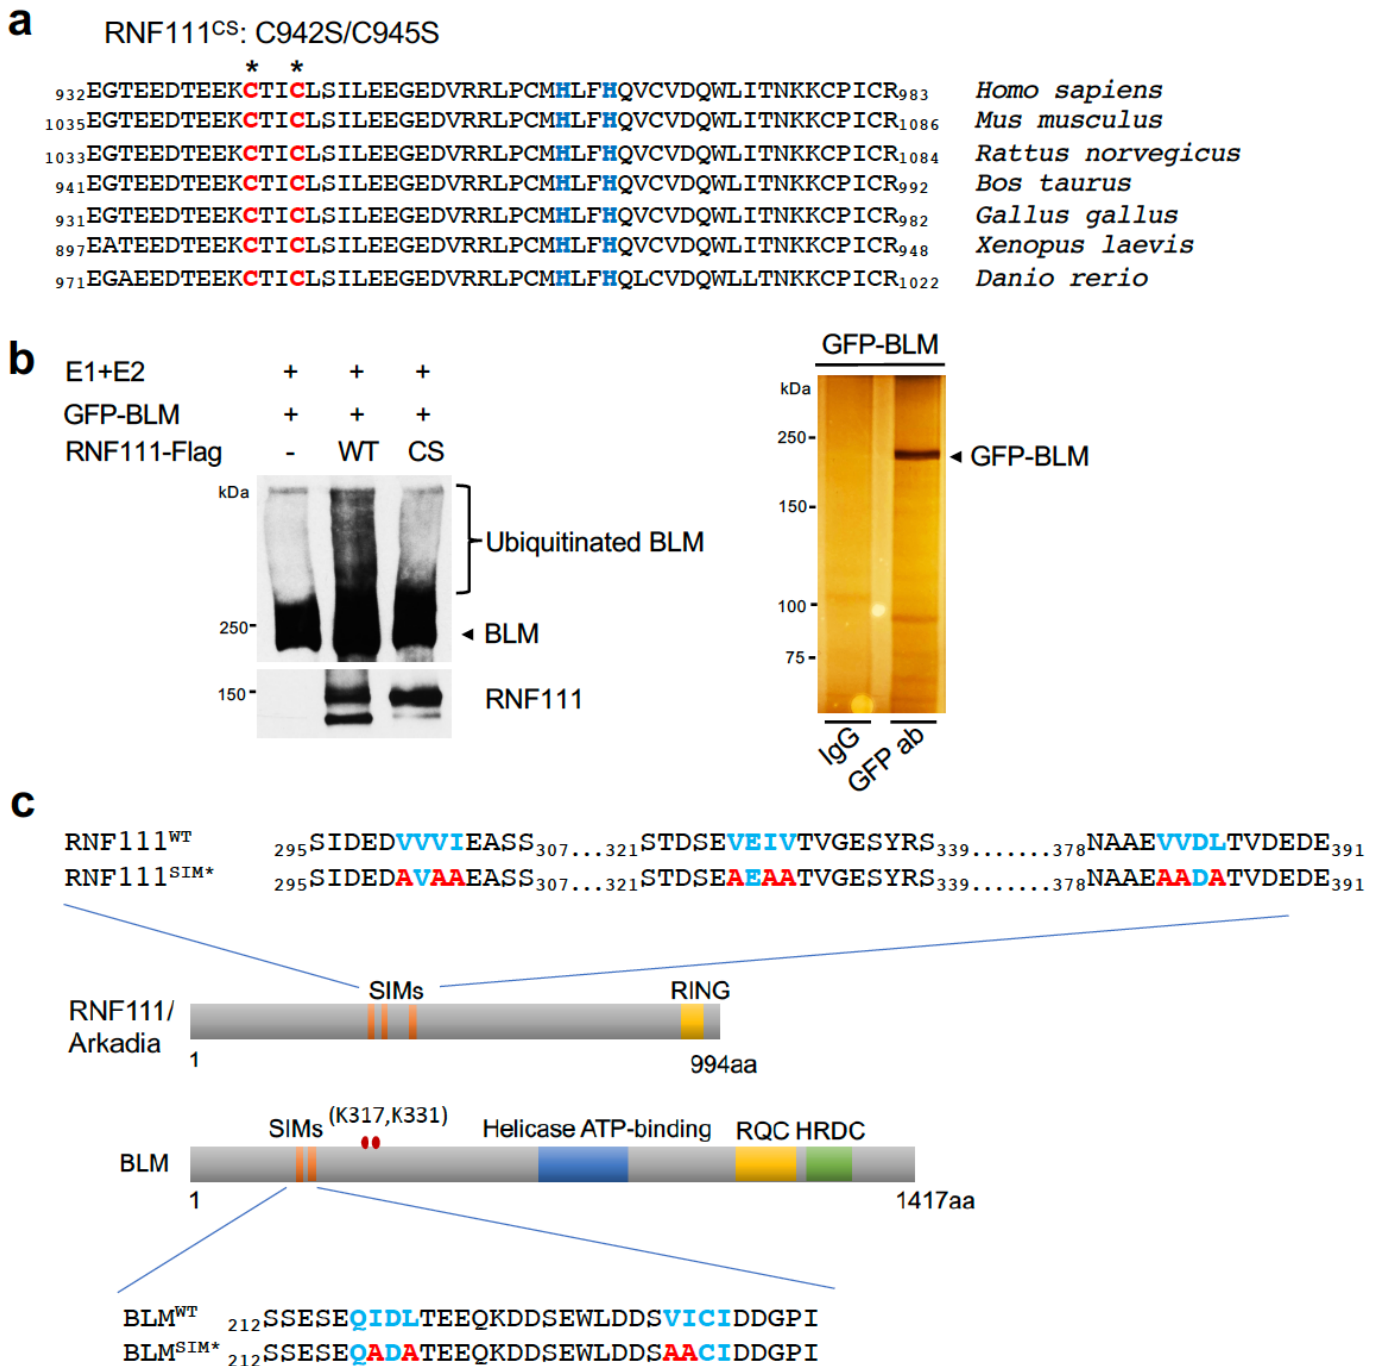

**Supplementary Fig.1 (related to Fig. 1). RNF111 ubiquitinates BLM and regulates BLM levels. (a)** Alignment of RNF111 RING domain and generation of RNF111<sup>CS</sup> mutant. **(b)** RNF111 ubiquitinates purified GFP-BLM *in vitro*. In vitro ubiquitination reaction was carried out with purified GFP-BLM in the absence or presence of immunoprecipitated RNF111-Flag WT or CS mutant. Left panel, western blots were performed with antibodies to BLM or RNF111; right panel, purified GFP-BLM with silver staining. **(c)** A schematic of RNF111/Arkadia and BLM protein domains and indicated mutants. RNF111 SIMs and RING domain, as well as BLM SIMs, SUMO modification sites (K317 and K331), helicase ATP-binding, RQC (RecQ C-terminal) and HRDC (helicase-and-ribonuclease D-C-terminal) domains are shown. Source data are provided as a Source Data file.

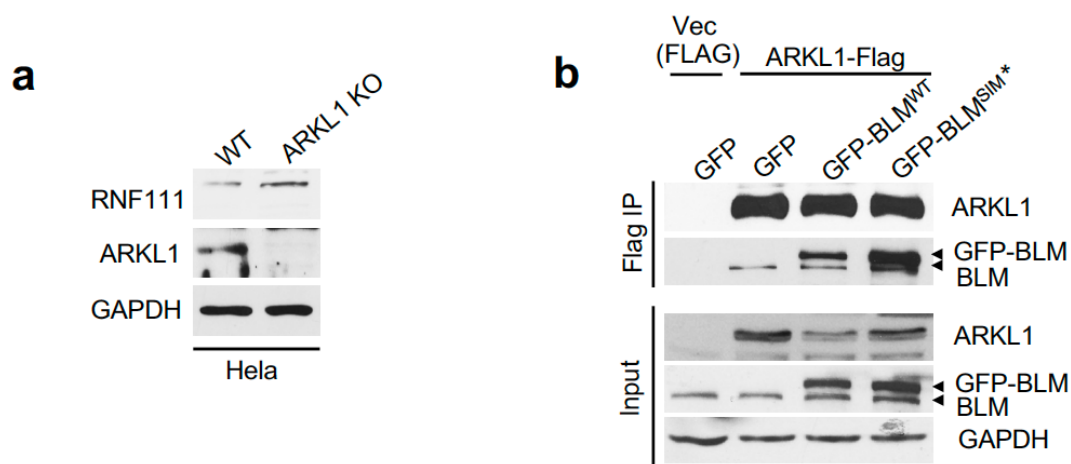

**Supplementary Fig. 2 (related to Fig. 2). ARKL1 promotes BLM ubiquitination and regulates BLM protein level (a) Increased RNF111 levels in ARKL1 KO cells. (b) ARKL1-Flag interacts with BLM<sup>WT</sup> or BLM<sup>SIM\*</sup> mutant. Flag IP was performed with lysates from 293T cells co-expressing ARKL1-Flag and GFP, GFP-BLM<sup>WT</sup> or GFP-BLM<sup>SIM\*</sup>.**

Source data are provided as a Source Data file.

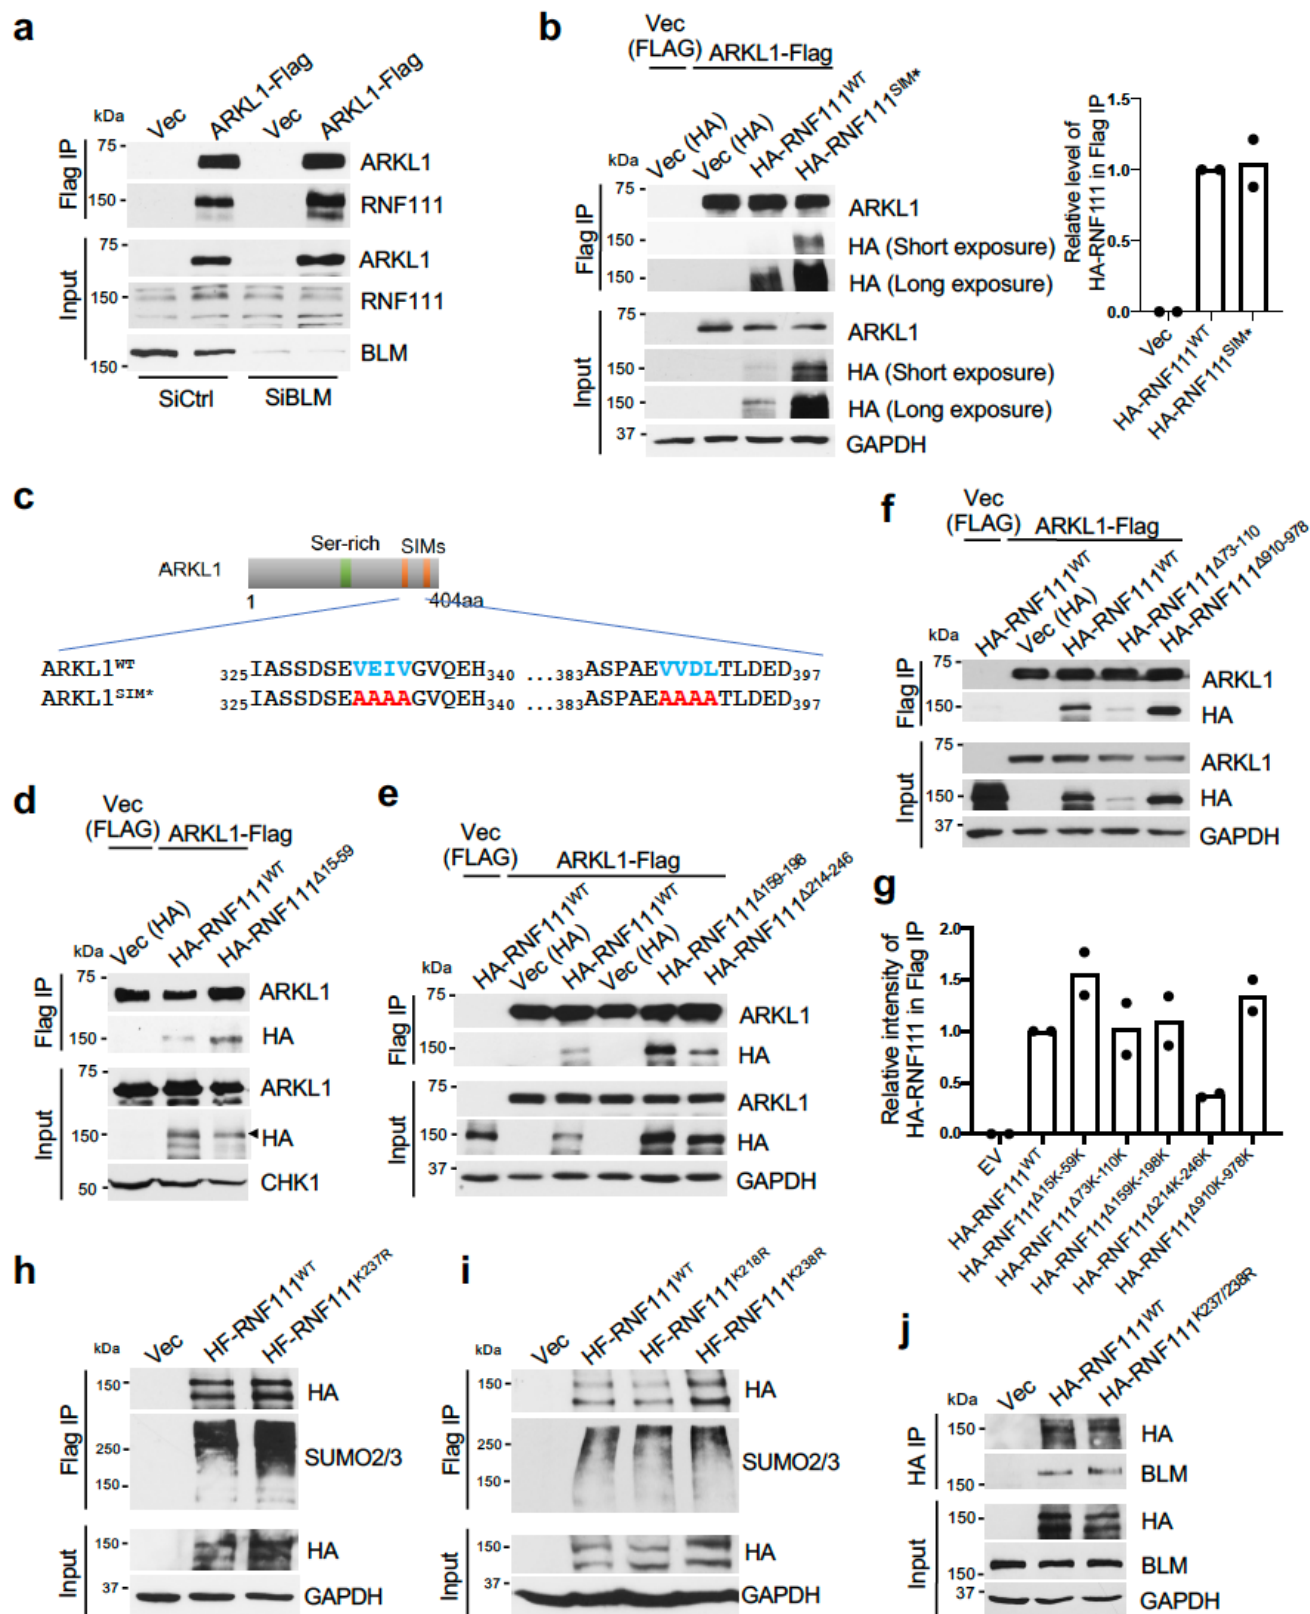

**Supplementary Fig.3 (related to Fig.3). ARKL1 interacts with RNF111 in a SIM-SUMO dependent manner.** (a) Knockdown of BLM does not affect ARKL1 and RNF111 interaction. The IPs were performed with Flag antibody using lysates of 293T cells expressing vector or ARKL1-FLAG and treated with indicated siRNAs. (b) The SIMs of RNF111 are not required for RNF111-ARKL1 interaction. The IPs were performed with FLAG antibody using lysates of 293T cells co-expressing ARKL1-Flag and vector, HA-RNF111<sup>WT</sup> or HA-RNF111<sup>SIM\*</sup>. Relative level of HA-RNF111 in ARKL1-FLAG IP (normalized by input HA-RNF111 and

ARKL1-Flag immunoprecipitates) is quantified (n=2 independent experiment). **(c)** Generation of ARKL1 SIM mutant. **(d-g)** Deletion of 214-246 amino acids of RNF111 decreases RNF111 interaction with ARKL1. The IPs were performed with Flag antibody using lysates of 293T cells co-expressing ARKL1-Flag and HA-tagged RNF111 deletion mutants. Chk1 or GAPDH was used as a loading control. Relative level of HA-RNF111 in ARKL1-Flag IP (normalized by input HA-RNF111 and ARKL1-Flag immunoprecipitates) is quantified (n=2 independent experiment). **(h)** K237R mutation alone does not affect HA-Flag-RNF111 SUMOylation. **(i)** K238R mutation alone does not affect HA-Flag-RNF111 SUMOylation. **(j)** The SUMOylation of RNF111 at K237/238 is not required for RNF111 and BLM interaction. The IPs were performed with HA antibody using lysates of 293T cells expressing vector, HA-RNF111<sup>WT</sup> or HA- RNF111<sup>K237/238R</sup>. Source data are provided as a Source Data file.

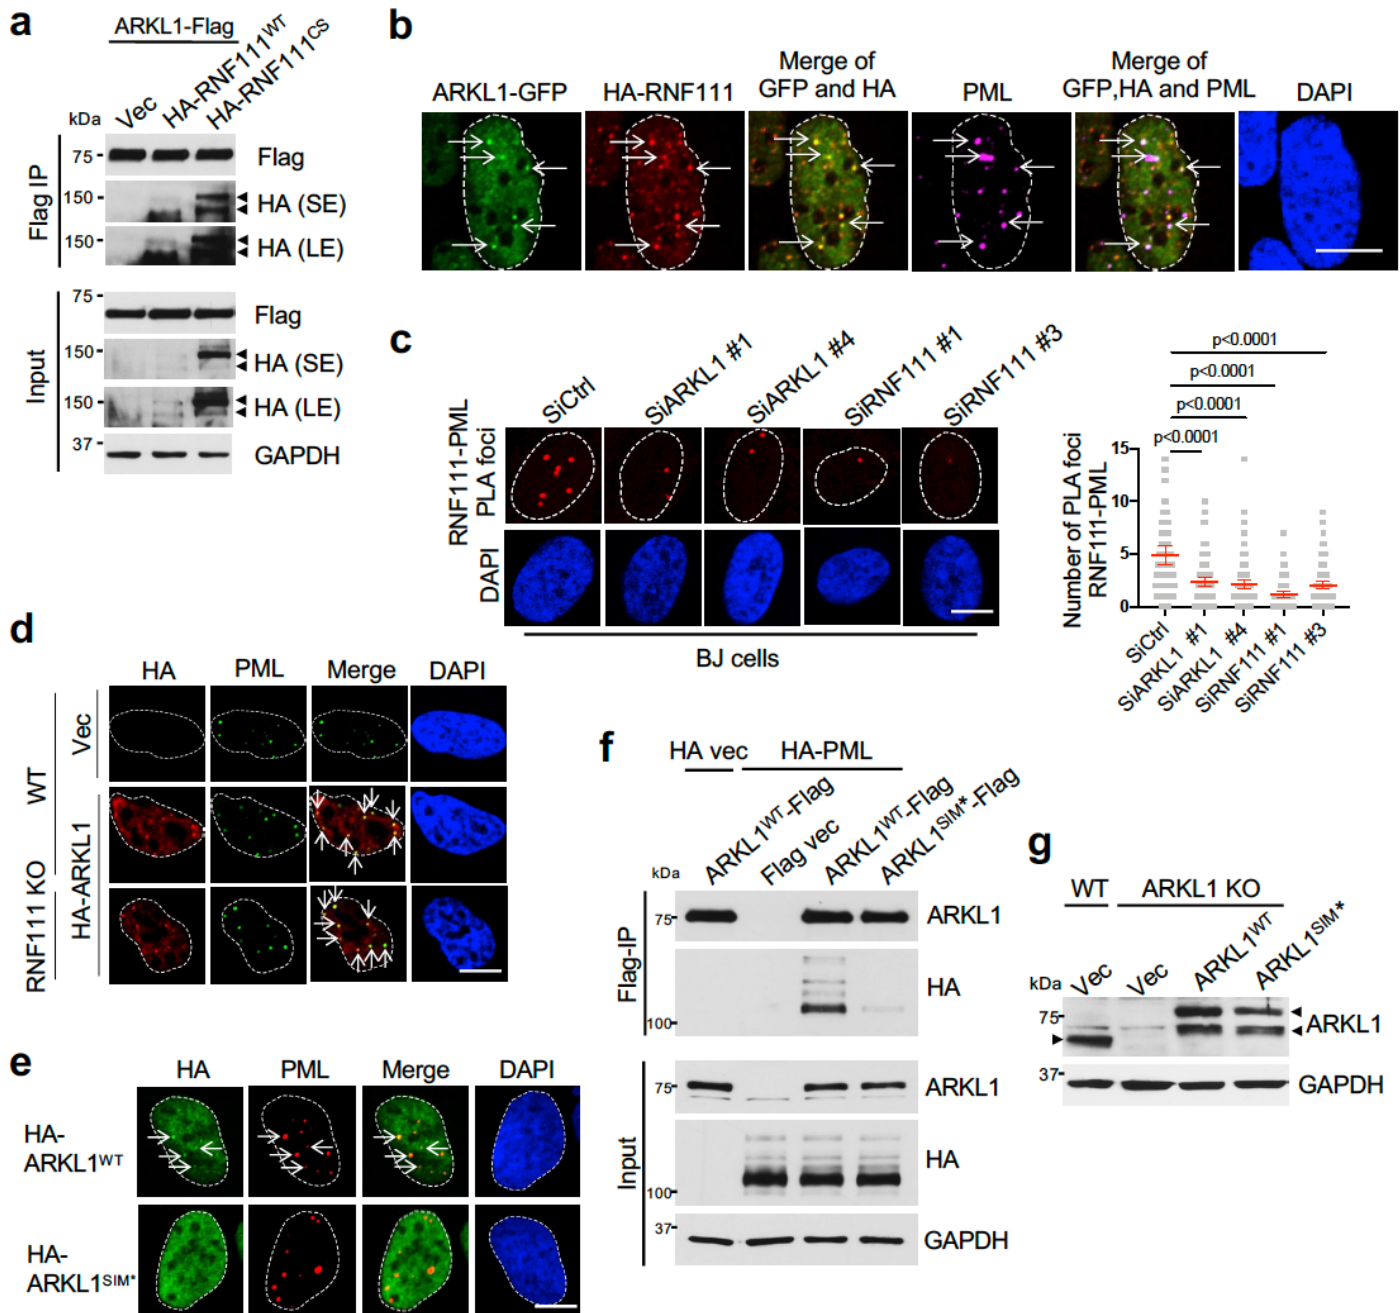

**Supplementary Fig.4 (related to Fig.4). ARKL1 promotes RNF111 localization to PML NBs.**

(a) RNF111<sup>CS</sup> is intact in the interaction with ARKL1. The IPs were performed with Flag antibody using lysates from 293T cells co-expressing ARKL1-Flag and empty vector, HA-RNF111<sup>WT</sup> or HA-RNF111<sup>CS</sup>. (b) ARKL1-GFP and HA-RNF111 form foci that colocalize with PML NBs. IF was carried out with GFP, HA and PML antibodies in U2OS cells. Arrows point to the colocalized foci. (c) ARKL1 knockdown reduces RNF111 and PML colocalization in BJ cells. PLA was performed with RNF111 and PML antibodies. Quantification is shown with mean  $\pm$  95% CI for cells treated with indicated siRNAs, siCtrl (n=119), SiARKL1 #1 (n=122), SiARKL1 #4 (n=127), SiRNF111 #1 (n=94), SiRNF111 #3 (n=129) from two biological replicates. Statistics: one-way ANOVA with Sidak's correction. (d) HA-ARKL1 localization to PML NBs is independent of RNF111. IF was carried out with HA and PML antibodies in WT or RNF111 KO U2OS cells expressing empty vector or HA-ARKL1. (e) ARKL1<sup>SIM\*</sup> fails to localize to PML NBs. (f) ARKL1 SIM domains are required for the interaction of ARKL1-Flag with HA-PML. (g) ARKL1 SIM domains are required for RNF111 recruitment to PML NBs. Expression of ARKL1<sup>WT</sup> and ARKL1<sup>SIM\*</sup> in ARKL1 KO HeLa cells for Fig.4g is shown. Left arrow, endogenous ARKL1; right arrow, Flag-tagged ARKL1.

Scale bar, 10  $\mu$ m for **b**, **c**, **d**, **e**. Source data are provided as a Source Data file.

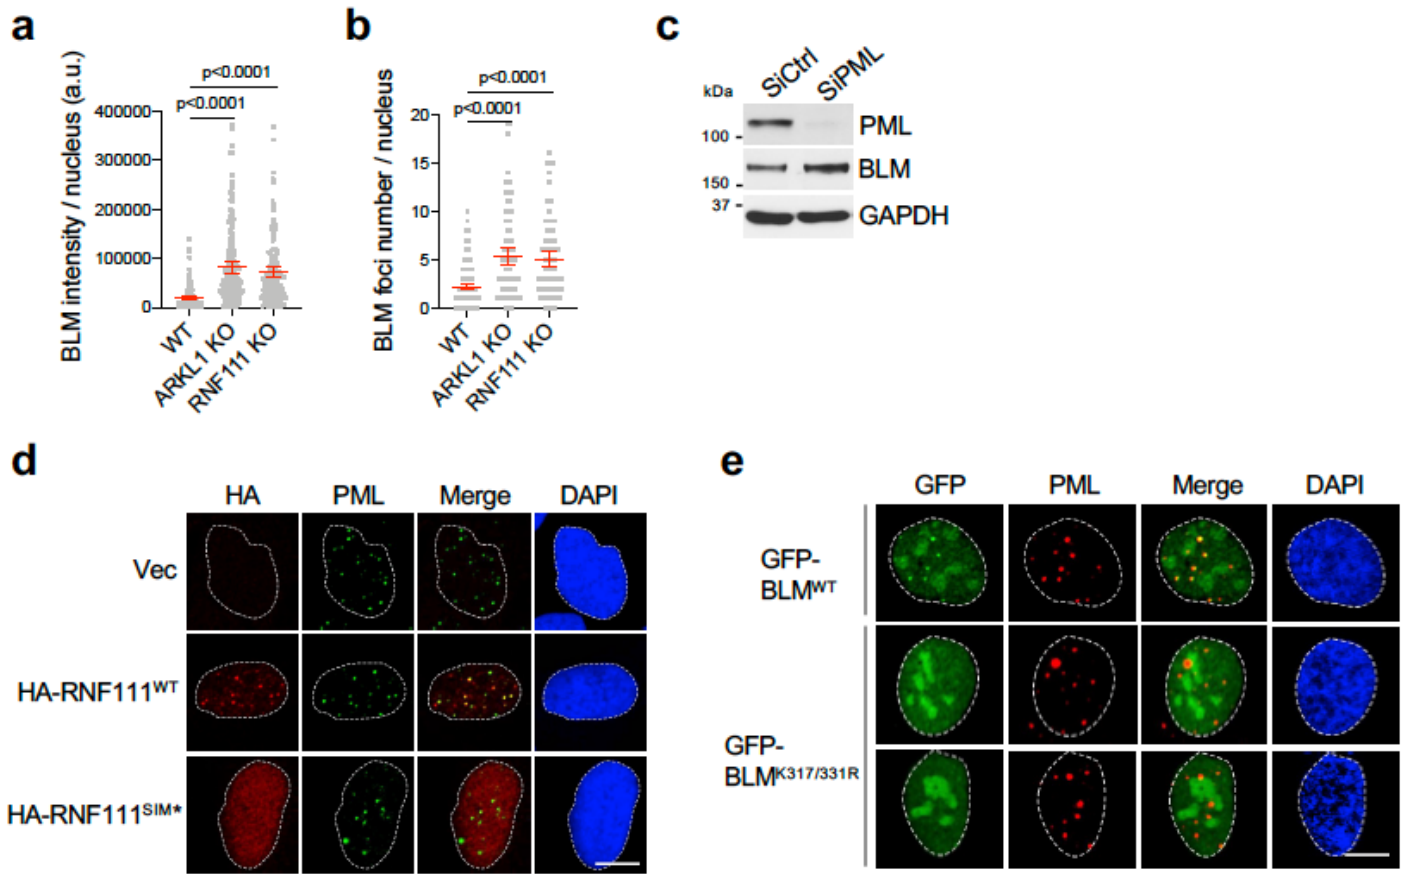

**Supplementary Fig.5 (related to Fig.5). RNF111-mediated ubiquitination of BLM is associated with PML NBs.** (a) (b) BLM levels and foci number are increased in ARKL1 KO and RNF111 KO U2OS cells. IF was performed with antibodies to BLM and PML. The representative images are shown in Fig. 5a. Quantification of BLM intensity and number of foci in each nucleus are shown with mean  $\pm$  95% CI for WT (n=174), ARKL1 KO (n=105), RNF111 KO (n=101) cells from two biological replicates. Statistical analysis was performed using one-way ANOVA test with Sidak's correction. (c) Depletion of PML leads to an elevation of BLM protein levels. (d) RNF111<sup>SIM\*</sup> mutant is deficient in localizing to PML NBs. (e) BLM<sup>K317/331R</sup> mutant is deficient in localizing to PML NBs. Scale bar, 10  $\mu$ m for **d**, **e**. Source data are provided as a Source Data file.



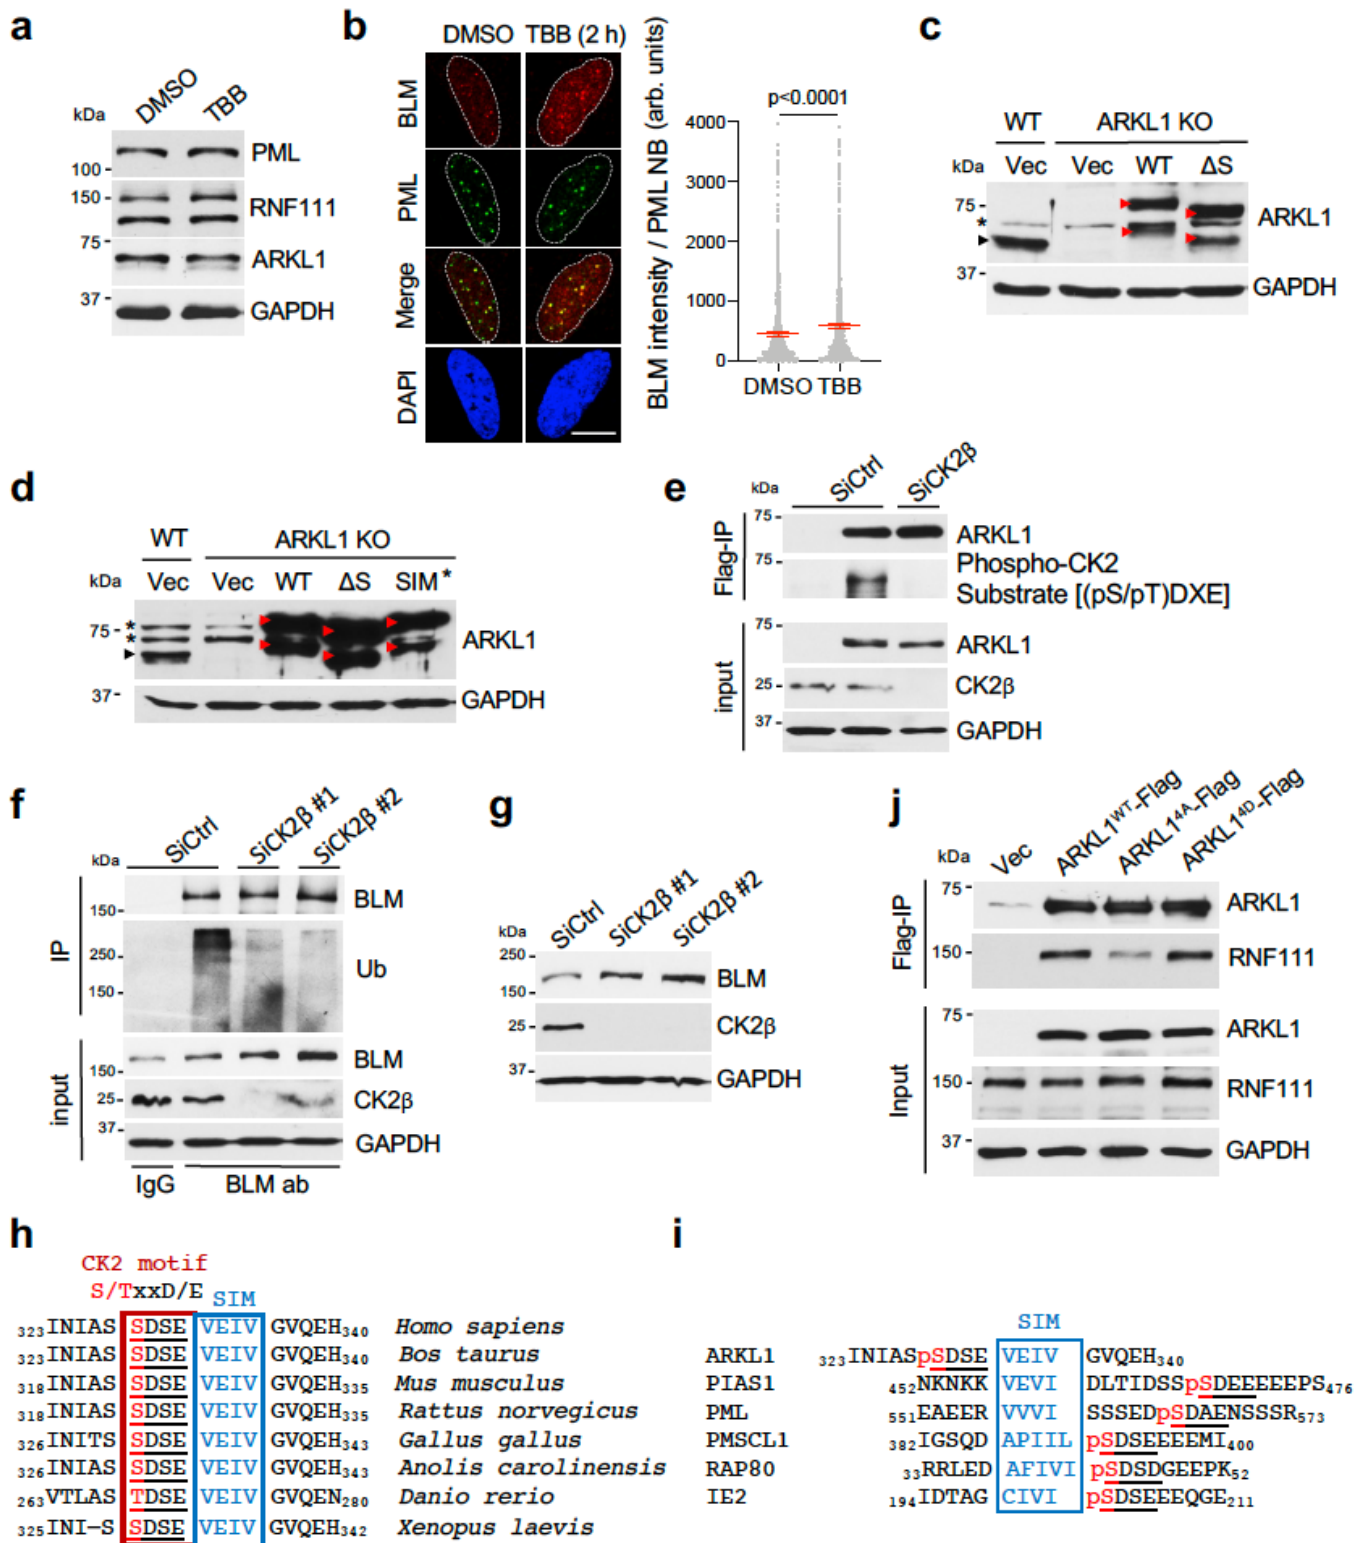

### Supplementary Fig.6 (related to Fig. 6). CK2 phosphorylates ARKL1 promoting ARKL1-RNF111 interaction and BLM ubiquitination.

(a) TBB treatment does not reduce the protein levels of PML, RNF111 or ARKL1. U2OS cells were treated with DMSO or TBB (50μM, 4 h). GAPDH was used as a loading control. (b) TBB treatment (50μM, 2 h) leads to increased BLM intensity in PML NBs in U2OS cells. Quantification with arbitrary (arb.) units is shown with mean ± 95% CI for DMSO-treated (n=1351) or TBB-treated (n=1154). Statistics: two-tailed unpaired t-test. Scale bar, 10μm. (c) Complementation of ARKL KO U2OS cells with expression of Flag-tagged ARKL1<sup>WT</sup> or ARKL1<sup>ΔS</sup> (related to Fig. 6e). Black arrow, endogenous ARKL1; red arrow, ARKL1-Flag; \*non-specific band.

**(d)** Western blot of WT or ARKL1 KO U2OS expressing indicated constructs used in Fig. 6f. Black arrow, endogenous ARKL1; red arrow, ARKL1-Flag; \*non-specific band. **(e)** Knockdown of CK2 $\beta$  abolishes ARKL1 phosphorylation by CK2. Western blot was performed with phospho-CK2 substrate [(pS/pT)DXE] antibody. **(f)** Knockdown of CK2 $\beta$  reduces BLM ubiquitination. **(g)** Knockdown of CK2 $\beta$  leads to increased BLM protein levels. **(h)** CK2 phosphorylation site on ARKL1 is conserved through various species. **(i)** Alignment of CK2 phosphorylation site adjacent to a SIM present in several SIM-containing proteins. **(j)** ARKL1<sup>4D</sup> (S327/328/330/385D) mutant interacts with RNF111 as ARKL1<sup>WT</sup> does while ARKL1<sup>4A</sup> (S327/328/330/385A) mutant exhibits decreased interaction with RNF111. 293T cells expressing indicated constructs were used. Source data are provided as a Source Data file.



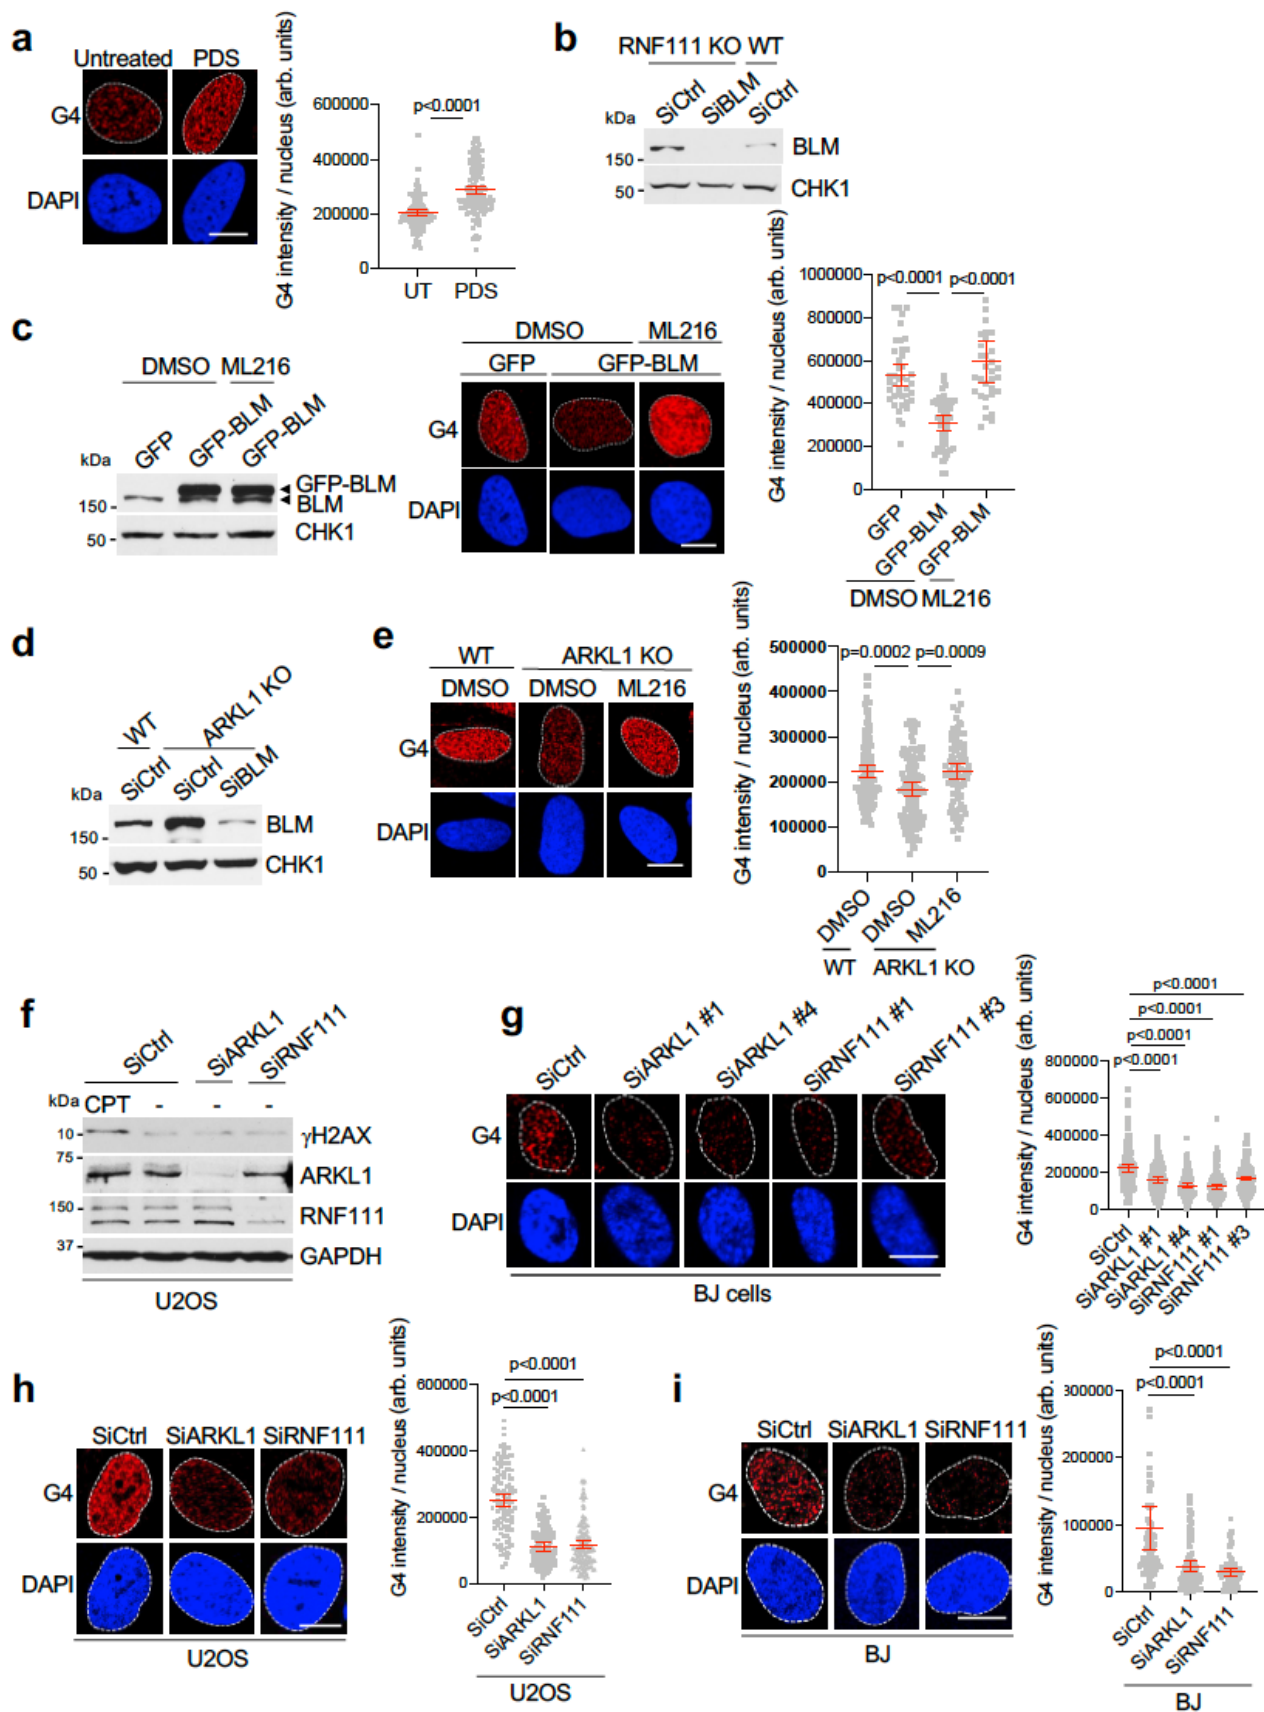

**Supplementary Fig.7 (related to Fig.7). RNF111-ARKL1 regulates G-quadruplex through modulating BLM levels.** (a) Increased G4 levels detected by BG4 antibody in U2OS cells treated with Pyridostatin (PDS) (10 $\mu$ M, 24h). G4 intensity was quantified with arbitrary (arb.) units for untreated (n=148) or PDS-treated (n=138) cells from two biological replicates. (b) Western blot of lysates from cells analyzed in Fig.7a showing

knockdown of BLM in RNF111 KO cells. CHK1 was used as a loading control. **(c)** Overexpression of GFP-BLM reduces G4 levels and the reduction is abolished by BLM helicase inhibitor ML216 (12.5 $\mu$ M, 48h). Expression of GFP-BLM in U2OS cells is detected by western blot with BLM antibody (left). IF was carried out with BG4 antibody (middle). Quantifications (right) are shown for cells expressing GFP treated with DMSO (n=42), GFP -BLM treated with DMSO (n=47), or ML216 (n=32). **(d)** Loss of ARKL1 reduces G4 levels in the nucleus and the reduction is abolished by BLM knockdown in U2OS cells. Western blots for Fig. 7d are shown. CHK1 was used as a loading control. **(e)** The G4 level is restored in ARKL1 KO cells treated with BLM helicase inhibitor ML216 (12.5 $\mu$ M, 72h). Quantifications are shown for the control U2OS WT cells treated with DMSO (n=101) or ARKL1 KO treated with DMSO (n=110) or ML216 (n=74) from two biological replicates. **(f)** Depletion of ARKL1 or RNF111 does not lead to elevated  $\gamma$ H2AX detected by western blot. CPT (1  $\mu$ M, 1 h) treatment of cells was used for a control. **(g)** G4 intensity in the nucleus is decreased in RNF111 or ARKL1 depleted BJ fibroblast cells. Quantifications of two biological replicates are shown with mean  $\pm$  95% CI for cells treated with Ctrl siRNA (n=147), SiARKL1#1 (n=118), SiARKL1#4 (n=123), SiRNF111#1 (n=112), SiRNF111#3 (n=177). **(h)** G4 intensity detected by G4 1H6 antibody in ARKL1 or RNF111-deficient U2OS cells. Quantifications of two biological replicates are shown for cells treated with Ctrl siRNA (n=112), SiARKL1 (n=94) and SiRNF111 (n=149). **(i)** G4 intensity detected by G4 1H6 antibody in ARKL1 or RNF111-deficient BJ cells. Quantifications of two biological replicates are shown for cells treated with siCtrl (n=64), SiARKL1 (n=79) and SiRNF111 (n=67).

Quantifications are shown with mean  $\pm$  95% CI for **a, c, e, g, h, i**. Statistics: two-tailed unpaired t-test for **a**, one-way ANOVA with Sidak's correction for **c, e, g, h, i**. Scale bar, 10 $\mu$ m for **a, c, e, g, h, i**. Source data are provided as a Source Data file.

**Supplementary Table 1. List of siRNAs used**

| Name                                                   | Cat# or sequence          |
|--------------------------------------------------------|---------------------------|
| ON-TARGET plus Non-targeting siRNAs                    | Horizon, D-001810-0X      |
| ON-TARGET plus Human C18orf25 (147339) siRNA-SMARTpool | Horizon, L-015948-02-0005 |
| ON-TARGET plus Human RNF111 (54778) siRNA-SMARTpool    | Horizon, L-007002-00-0005 |
| siARKL1#1                                              | GUGAAGUAAUAUUGGCUUA       |
| siARKL1#4                                              | AGGCAGAAACGGCGGUAGA       |
| siRNF111#1                                             | GUACAUACUUGCAGAUUUA       |
| siRNF111#3                                             | CCAAAGAUGGCAUGACUUA       |
| siBLM                                                  | AUCAGCUAGAGGCGAUCAA       |
| siPML                                                  | GGCUUCGACGAGUUCAA         |
| SiCK2 $\beta$ #1                                       | AGAAGAAUUCAUUGCCACGGAGCCC |
| SiCK2 $\beta$ #2                                       | GGACAAAUUUAUCUUACU        |

**Supplementary Table 2. List of plasmids used**

| Name                                                | Source                                                   |
|-----------------------------------------------------|----------------------------------------------------------|
| pcDNA3.1-ARKL1 <sup>WT</sup> -3xFLAG                | This paper                                               |
| pcDNA3.1-ARKL1 <sup>SIM*</sup> -3xFLAG              | This paper                                               |
| pcDNA3.1-ARKL1 <sup>ΔS</sup> -3xFLAG                | This paper                                               |
| pcDNA3.1-ARKL1 <sup>S328A</sup> -3xFLAG             | This paper                                               |
| pcDNA3.1-ARKL1 <sup>S327/328/330/385A</sup> -3xFLAG | This paper                                               |
| pcDNA3.1-ARKL1 <sup>S327/328/330/385D</sup> -3xFLAG | This paper                                               |
| MSCV-3HA-ARKL1 <sup>WT</sup>                        | This paper                                               |
| MSCV-3HA-ARKL1 <sup>SIM*</sup>                      | This paper                                               |
| MSCV-GFP-ARKL1 <sup>WT</sup>                        | This paper                                               |
| MSCV-HA-Flag-ARKL1 <sup>WT</sup>                    | This paper                                               |
| pAID5.3-RNF111 <sup>WT</sup> -miniAID               | This paper                                               |
| pAID5.3-RNF111 <sup>SIM*</sup> -miniAID             | This paper                                               |
| pAID5.3-RNF111 <sup>CS</sup> -miniAID               | This paper                                               |
| pcDNA3.1-RNF111 <sup>WT</sup> -3xFLAG               | This paper                                               |
| pcDNA3.1-RNF111 <sup>SIM*</sup> -3xFLAG             | This paper                                               |
| pcDNA3.1-RNF111 <sup>CS</sup> -3xFLAG               | This paper                                               |
| MSCV-HA-Flag-RNF111 <sup>WT</sup>                   | This paper                                               |
| MSCV-HA-Flag-RNF111 <sup>K218/237R</sup>            | This paper                                               |
| MSCV-HA-Flag-RNF111 <sup>K237/238R</sup>            | This paper                                               |
| MSCV-3HA-RNF111 <sup>WT</sup>                       | This paper                                               |
| MSCV-3HA-RNF111 <sup>Δ15-59</sup>                   | This paper                                               |
| MSCV-3HA-RNF111 <sup>Δ73-110</sup>                  | This paper                                               |
| MSCV-3HA-RNF111 <sup>Δ159-198</sup>                 | This paper                                               |
| MSCV-3HA-RNF111 <sup>Δ214-246</sup>                 | This paper                                               |
| MSCV-3HA-RNF111 <sup>Δ910-978</sup>                 | This paper                                               |
| MSCV-3HA-RNF111 <sup>SIM*</sup>                     | This paper                                               |
| GFP-BLM <sup>SIM*</sup>                             | This paper                                               |
| MSCV-GFP-PML (PML isoform II)                       | This paper                                               |
| MSCV-mcherry-PML (isoform II)                       | This paper                                               |
| pcDNA3.1-ARKL1 <sup>WT</sup> -3xFLAG                | This paper                                               |
| GFP-BLM                                             | A gift from Nathan Ellis<br>(Addgene plasmid #80070)     |
| pAID5.3-C                                           | A gift from Masato Kanemaki<br>(Addgene plasmid #145813) |
| pCMV-Tol2                                           | A gift from Stephen Ekker<br>(Addgene plasmid#31823)     |

**Supplementary Table 3. List of primers used**

| Name                    | Sequence                                                                              |
|-------------------------|---------------------------------------------------------------------------------------|
| BLM SIM1 fw             | GTCATCCTTCTGTTCCCTCAGTCGCATCTGCTTGCTCGC<br>TTTCAGAGGAGGGTG                            |
| BLM SIM1 rev            | CACCCTCCTCTGAAAGCGAGCAAGCAGATGCGACTGA<br>GGAACAGAAGGATGAC                             |
| BLM SIM2 fw             | GGGGCCATCATCGATGCAAGCCGCATCGCTGCTTAAC<br>CATTC                                        |
| BLM SIM2 rev            | GAATGGTTAAGCAGCGATGCGGCTTGCATCGATGATG<br>GCCCC                                        |
| ARKL1 SIM1 fw           | CCTTGCATGTTCTGAACTCCCGCAGCCTCTGCTTCAC<br>TATCTGAAGACGCAAT                             |
| ARKL1 SIM1 rev          | ATTGCGTCTTCAGATAGTGAAGCAGAGGCTGCGGGAG<br>TTCAGGAACATGCAAGG                            |
| ARKL1 SIM2 fw           | TGGGCTTCACCAGCAGAAGCTGCTGACGCTACCTTGG<br>ATGAGGATAGC                                  |
| ARKL1 SIM2 rev          | GCTATCCTCATCCAAGGTAGCGTCAGCAGCTTCTGCTG<br>GTGAAGCCCA                                  |
| ARKL1 S385A fw          | CAACTTCTGCTGGTGCAGCCCAAGTCTGCTG                                                       |
| ARKL1 S385A rev         | CAGCAGACTTGGGCTGCACCAGCAGAAGTTG                                                       |
| ARKL1 S327/328/330A fw  | ACTCAATGAAGAAATTAACATTGCGGCTGCAGATGCT<br>GAAGTAGAGATTGTGGGAGTTCAG                     |
| ARKL1 S327/328/330A rev | CTGAACTCCCACAATCTCTACTTCAGCATCTGCAGCCG<br>CAATGTTAATTTCTTCATTGAGT                     |
| ARKL1 S385D fw          | GTCAACAACCTTCTGCTGGATCAGCCCAAGTCTGCTGG<br>GGAG                                        |
| ARKL1 S385D rev         | CTCCCCAGCAGACTTGGGCTGATCCAGCAGAAGTTGT<br>TGAC                                         |
| ARKL1 S327/328/330D fw  | AATGCGCCACTCAATGAAGAAATTAACATTGCGGATG<br>ATGATGATGAAGTAGAGATTGTGGGAGTTCAGGAACA<br>TGC |
| ARKL1 S327/328/330D rev | GCATGTTCTGAACTCCCACAATCTCTACTTCATCATC<br>ATCATCCGCAATGTTAATTTCTTCATTGAGTGGCGCAT<br>T  |
| ARKL1 S328A fw          | CACAATCTCTACTTCACTATCTGCAGACGCAATGTTA<br>TTTCTTCAT                                    |
| ARKL1 S328A rev         | ATGAAGAAATTAACATTGCGTCTGCAGATAGTGAAGT<br>AGAGATTGTG                                   |
| ARKL1 $\Delta$ S fw     | AAGGAAGAAATATAACCTGCTGGATGATGATGAAGA<br>GGTTTCAG                                      |
| ARKL1 $\Delta$ S rev    | CTGAAACCTCTTCATCATCATCCAGCAGGTTATATTTC<br>TTCCTT                                      |
| RNF111 SIM1 fw          | TGGGGAGTGGAGGAAGCTTCTGCCGCCACAGCATCTT<br>CATCAATACTTCCTG                              |

|                             |                                                            |
|-----------------------------|------------------------------------------------------------|
| RNF111 SIM1 rev             | CAGGAAGTATTGATGAAGATGCTGTGGCGGCAGAAGC<br>TTCCTCCACTCCCCA   |
| RNF111 SIM2 fw              | CCGATAGCTTTCTCCAAGTGTGCAGCCTCCGCTTCAC<br>TGTCAGTTGAGGTAAC  |
| RNF111 SIM2 rev             | GTTACCTCAACTGACAGTGAAGCGGAGGCTGCAACAG<br>TTGGAGAAAGCTATCGG |
| RNF111 SIM3 fw              | GTTTCATCTTCATCAACGGTAGCGTCCGCAGCTTCTGCT<br>GCATTCTGCCTC    |
| RNF111 SIM3 rev             | GAGGCAGAATGCAGCAGAAGCTGCGGACGCTACCGTT<br>GATGAAGATGAAC     |
| RNF111 C943/946S fw         | CTTCCTCTAAAATAGACAAACTGATAGTACTTTTTTCC<br>TCTGTGTCTTCCTCA  |
| RNF111 C943/946S rev        | TGAGGAAGACACAGAGGAAAAAAGTACTATCAGTTT<br>GTCTATTTTAGAGGAAG  |
| RNF111 $\Delta$ 15-59 fw    | CCTGAATATAACGAGCTCTACACCTTAGTGGGGAATG<br>AATTC             |
| RNF111 $\Delta$ 1-59 rev    | GAATTCATTCCCCACTAAGGTGTAGAGCTCGTTATATT<br>CAGG             |
| RNF111 $\Delta$ 73-110 fw   | TCCTAATATTCCCTGGTTTTCTTGAGAATCATCACACA<br>GGTG             |
| RNF111 $\Delta$ 73-110 rev  | CACCTGTGTGATGATTCTCAAGAAAACCAGGGAATAT<br>TAGGA             |
| RNF111 $\Delta$ 159-198 fw  | CATGTAAACAGGGTCTATCCTCATCTGAAGTCACAGT<br>ATCAG             |
| RNF111 $\Delta$ 159-198 rev | CTGATACTGTGACTTCAGATGAGGATAGACCCTGTTT<br>ACATG             |
| RNF111 $\Delta$ 214-246 fw  | GGAGACTTCCATGCAGATATGCCTTGCTACCTAG                         |
| RNF111 $\Delta$ 214-246 rev | CTAGGTAGCAAGGCATATCTGCATGGAAGTCTCC                         |
| RNF111 $\Delta$ 910-978 fw  | GGACAATTGAAAGATGTACATATCCACATTGCCCCAT<br>ATGCAGA           |
| RNF111 $\Delta$ 910-978 rev | TCTGCATATGGGGCAATGTGGATATGTACATCTTTCAA<br>TTGTCC           |



**Supplementary Table 4. List of antibodies used**

| Name                                                                                 | Cat #                               | Dilution                               |
|--------------------------------------------------------------------------------------|-------------------------------------|----------------------------------------|
| BLM Antibody (C-1)                                                                   | Santa Cruz, sc-376237               | 1:200 for IF or PLA<br>1:200 for WB    |
| BLM Antibody (C-18)                                                                  | Santa Cruz, sc-7790                 | 1:200 for IF or PLA                    |
| HA-Tag Antibody (C29F4)                                                              | Cell Signaling, 3724S               | 1:800 for IF or PLA<br>1:2000 for WB   |
| HA-Tag (6E2)                                                                         | Cell Signaling, 2367S               | 1:800 for IF or PLA<br>1:2000 for WB   |
| PML Antibody (PG-M3)                                                                 | Santa Cruz, sc-966                  | 1:200 for IF or PLA                    |
| GFP Antibody (1A5)                                                                   | Santa Cruz, sc-101536               | 1:200 for IF                           |
| DNA G-quadruplex structures Antibody (BG4)                                           | Sigma-Aldrich, MABE917              | 1:200 for IF                           |
| DNA G-quadruplex (G4) Antibody (1H6) ZooMAb® Mouse Monoclonal                        | Sigma-Aldrich, ZMS1070              | 1:600 for IF                           |
| FLAG antibody                                                                        | Millipore, F7425                    | 1:600 for IF<br>1:1000 for WB          |
| ARKL1 antibody                                                                       | Home-made                           | 1:1000 for IF or PLA<br>1:10000 for WB |
| RNF111 antibody                                                                      | Sigma-Aldrich, HPA038576            | 1:600 for IF or PLA<br>1:2000 for WB   |
| BLM Antibody                                                                         | Bethyl Laboratories, A300-110A      | 1:2000 for WB                          |
| PML Antibody (E-11)                                                                  | Santa Cruz, sc-377390               | 1:100 for WB                           |
| RNF111 antibody (M05)                                                                | Abnova, H00054778-M05               | 1:500 for WB                           |
| GAPDH Antibody (GA1R)                                                                | Thermo Fisher Scientific, MA5-15738 | 1:10000 for WB                         |
| Chk1 Antibody (G-4)                                                                  | Santa Cruz, sc-8408                 | 1:200 for WB                           |
| SUMO-2/3 antibody (18H8)                                                             | Cell Signaling, 4971S               | 1:2000 for WB                          |
| Ubiquitin Antibody (P4D1)                                                            | Santa Cruz, sc-8017                 | 1:200 for WB                           |
| Phospho-CK2 Substrate [(pS/pT)DXE] antibody                                          | Cell Signaling, 8738                | 1:1000 for WB                          |
| Casein kinase II $\beta$ (6D5) antibody                                              | Santa Cruz, sc-12739                | 1:200 for WB                           |
| $\gamma$ H2AX antibody                                                               | Millipore, 05-636                   | 1:1000 for WB                          |
| Duolink™ In Situ PLA Probe Anti-Rabbit MINUS                                         | Sigma-Aldrich, DUO92005             | 1:5 for PLA                            |
| Duolink™ In Situ PLA Probe Anti-Mouse PLUS                                           | Sigma-Aldrich, DUO92001             | 1:5 for PLA                            |
| Goat anti-Mouse IgG (H+L) Highly Cross-Adsorbed Secondary Antibody, Alexa Fluor 647  | Thermo Fisher Scientific, A-21236   | 1:1000 for IF                          |
| Goat anti-Rabbit IgG (H+L) Highly Cross-Adsorbed Secondary Antibody, Alexa Fluor 647 | Thermo Fisher Scientific, A-21245   | 1:1000 for IF                          |

|                                                                                        |                                   |               |
|----------------------------------------------------------------------------------------|-----------------------------------|---------------|
| Donkey anti-Mouse IgG (H+L) Highly Cross-Adsorbed Secondary Antibody, Alexa Fluor 488  | Thermo Fisher Scientific, A-21202 | 1:1000 for IF |
| Goat anti-Rabbit IgG (H+L) Cross-Adsorbed Secondary Antibody, Alexa Fluor 488          | Thermo Fisher Scientific, A-11008 | 1:1000 for IF |
| Goat anti-Rat IgG (H+L) Cross-Adsorbed Secondary Antibody, Alexa Fluor 488             | Thermo Fisher Scientific, A-11006 | 1:1000 for IF |
| Donkey anti-Rabbit IgG (H+L) Highly Cross-Adsorbed Secondary Antibody, Alexa Fluor 555 | Thermo Fisher Scientific, A-31572 | 1:1000 for IF |
| Donkey anti-Goat IgG (H+L) Cross-Adsorbed Secondary Antibody, Alexa Fluor 555          | Thermo Fisher Scientific, A-21432 | 1:1000 for IF |
| Donkey anti-Mouse IgG (H+L) Highly Cross-Adsorbed Secondary Antibody, Alexa Fluor 555  | Thermo Fisher Scientific, A-31570 | 1:1000 for IF |
